# Supplementary material for: Secretome Prediction of Two M. tuberculosis Clinical Isolates Reveals Their High Antigenic Density and Potential Drug Targets
Source: Front Microbiol. 2017 Feb 7;8:128. doi: 10.3389/fmicb.2017.00128 (PMC5293778; doi:10.3389/fmicb.2017.00128)
Supplement: Supplementary file 4 [file Table4.XLSX]

## Sheet: Table S5 
S4 Table. Experimental secretome proteins
Protein ID	Reference
A0A0E3WC69_9MYCO	Zhou et al., 2015
A85A_MYCTU	Malen et al., 2007; Sinha et al., 2005; Gu et al., 2003; Mattow et al.;2003			Vizcaíno et al. Computational Prediction and Experimental Assessment of Secreted/Surface Proteins from Mycobacterium tuberculosis H37Rv. Bourne PE, editor. PLoS Comput Biol. 2010 Jun 24;6(6):e1000824–19
A85B_MYCTU	Malen et al., 2007; Sinha et al., 2005; Gu et al., 2003; Mattow et al., 2003			Sinha S,et al. Proteome analysis of the plasma membrane of Mycobacterium tuberculosis. Comp Funct Genomics; 2002; 3: 470–483.
A85C_MYCTU	Zhou et al., 2015			Saint-Joanis et al., Inactivation of Rv2525c, a substrate of the twin arginine traslocation (Tat) system of Mycobacterium tuberculosis, increase ß lactam suceptibility and virulence
ACEA_MYCTU	Mattow et al., 2003			Roy A, et al., A Database for Mycobacterium Secretome Analysis: “MycoSec” to Accelerate Global Health Research. OMICS: A Journal of Integrative Biology. 2013 Oct;17(10):502–9
ACNA_MYCTU	Vizcaíno et al., 2010			Nagai S, et al., Isolation and partial characterization of major protein antigens in the culture fluid of Mycobacterium tuberculosis Infect Immun 1991 Jan; 59(1):372-382
ACR_MYCTU	Mattow et al., 2003; Zhou et al., 2015			Mattow J, et al, Comparative proteome analysis of culture supernatant proteins from virulent Mycobacterium tuberculosis H37Rv and attenuated M. bovis BCG Copenhagen. Electrophoresis, 2003; 24(1920):3405-3420
ALF_MYCTU	Malen et al., 2007; Mattow et al., 2003			Målen H, et al, Comprehensive analysis of exported proteins fromMycobacterium tuberculosis H37Rv. Proteomics. 2007 May;7(10):1702–18.
APA_MYCTU	Malen et al., 2007; Mattow et al., 2003			He Xiu-Yun, et al., Comparative proteome analysis of culture supernatant proteins of Mycobacterium tuberculosis H37Rv and H37Ra. Microbes and Infections; 2003 5:851-856
ARCH_MYCTU	Zhou et al., 2015			Gu S, et al. Comprehensive proteomic profiling of the membrane constituents of a Mycobacterium tuberculosis strain. Mol Cell Proteomics; 2003 2: 1284–1296
ARGC_MYCTU	Mattow et al., 2003			Bahk YY, et al. Antigens secreted fromMycobacterium tuberculosis: Identification by proteomics approach and test for diagnostic marker. Proteomics. 2004 Nov;4(11):3299–307
ARGD_MYCTU	Mattow et al., 2003			Zhou F, et al, . Protein array identification of protein markers for serodiagnosis of Mycobacterium tuberculosis infection. Sci Rep. Nature Publishing Group; 2015 Oct 7;:1–10.
AROC_MYCTU	Mattow et al., 2003
ASNH_MYCTU	Vizcaino et al., 2010
ATPB_MYCTU	Vizcaino et al., 2010
BFR_MYCTU	Vizcaino et al., 2010
BFRB_MYCTU	Malen et al., 2007; Mattow et al., 2003; Zhou et al., 2015
BLAC_MYCTU	Vizcaino et al., 2010
CAEA_MYCTU	Vizcaino et al., 2010
CH10_MYCTU	Malen et al., 2007; Mattow et al., 2003
CH602_MYCTU	Mattow et al., 2003
CLGR_MYCTU	Zhou et al., 2015
CLPB_MYCTU	Mattow et al., 2003; Chande et al., 2015
COBD_MYCTU	Vizcaino et al., 2010
COX2_MYCTU	Vizcaino et al., 2010
CSM6_MYCTU	Sinha et al., 2005; Gu et al., 2003; Bahk et al., 2004
CSPA_MYCTU	Gu et al., 2003; Mattow et al., 2003; Sinha et al., 2005; Bahk et al., 2004
CUT1_MYCTU	Vizcaino et al., 2010
CUT2_MYCTU	Malen et al., 2007; Mattow et al., 2003; Vizcaino et al., 2010
CYSK_MYCTU	Malen et al., 2007; Mattow et al., 2003
CYSO_MYCTU	Mattow et al., 2003
DAPB_MYCTU	Mattow et al., 2003
DEVR_MYCTU	Mattow et al., 2003; Zhou et al., 2015
DHA_MYCTU	Mattow et al., 2003
DHMA2_MYCTU	Vizcaino et al., 2010
DLDH_MYCTU	Malen et al., 2007; Mattow et al., 2003
DNAK_MYCTU	Malen et al., 2007; Mattow et al., 2003
DODEC_MYCTU	Mattow et al., 2003
DPO3B_MYCTU	Vizcaino et al., 2010
ECCB3_MYCTU	Vizcaino et al., 2010
ECHA6_MYCTU	Mattow et al., 2003
EFP_MYCTU	Mattow et al., 2003
EFTS_MYCTU	Mattow et al., 2003
EFTU_MYCTU	Mattow et al., 2003
ES6L6_MYCTU	He et al., 2003
ES6L7_MYCTU	He et al., 2003
ES6LA_MYCTU	He et al., 2003
ESPF_MYCTU	Sinha et al., 2005; Gu et al., 2003; Bahk et al., 2004
ESPR_MYCTU	Zhou et al., 2015
ESXA_MYCTU	Malen et al., 2007; Mattow et al., 2003; Zhou et al., 2015
ESXB_MYCTU	Malen et al. 2007; Sinha et al., 2005; Gu et al., 2003; Mattow et al., 2003; Bahk et al., 2004
ESXG_MYCTU	Malen et al., 2007; Mattow et al., 2003
ESXI_MYCTU	Vizcaino et al., 2010
ESXJ_MYCTU	Malen et al., 2007; He et al., 2003
ESXK_MYCTU	Vizcaino et al., 2010
ESXL_MYCTU	Malen et al., 2007; Mattow et al., 2003
ESXN_MYCTU	Malen et al., 2007; Mattow et al., 2003
ESXO_MYCTU	He et al., 2003
ESXP_MYCTU	He et al., 2003
ESXW_MYCTU	He et al., 2003
ETFA_MYCTU	Mattow et al., 2003
ETFB_MYCTU	Mattow et al., 2003
F5BH90_MYCTX	Vizcaino et al., 2010
F5BH92_MYCTX	Vizcaíno et al., 2010
FADA4_MYCTU	Malen et al., 2007; Mattow et al., 2003
FADB2_MYCTU	Mattow et al., 2003
FER_MYCTU	Zhou et al., 2015
FHAA_MYCTU	Mattow et al., 2003
FHAB_MYCTU	Vizcaino et al., 2010
FPRA_MYCTU	Zhou et al., 2015; Vizcaíno et al., 2010
FQR58_MYCTU	Mattow et al., 2003
FUMC_MYCTU	Malen et al., 2007; Mattow et al., 2003
G3P_MYCTU	Malen et al., 2007; Mattow et al., 2003
GARA_MYCTU	Malen et al., 2007; Mattow et al., 2003
GLNA1_MYCTU	Malen et al., 2007; Mattow et al., 2003
GLYA1_MYCTU	Mattow et al., 2003
GREA_MYCTU	Mattow et al., 2003
GRPE_MYCTU	Mattow et al., 2003
GSA_MYCTU	Mattow et al., 2003
HRP1_MYCTU	Mattow et al., 2003; Zhou et al., 2015
HTPG_MYCTU	Vizcaino et al., 2010
HTPX_MYCTU	Vizcaino et al., 2010
I6WYY7_MYCTU	Mattow et al., 2003
I6WZ26_MYCTU	Vizcaino et al., 2010
I6WZ26_MYCTU	Zhou et al., 2015
I6X9V3_MYCTU	Mattow et al., 2003
I6X9Y7_MYCTU	Vizcaino et al., 2010
I6XEH5_MYCTU	Zhou et al., 2015
I6XW38_MYCTU	Mattow et al., 2003
I6XWE5_MYCTU	Vizcaino et al., 2010
I6XY36_MYCTU	Malen et al., 2007; Mattow et al., 2003
I6Y276_MYCTU	Mattow et al., 2003
I6Y4F1_MYCTU	Vizcaino et al., 2010
I6Y778_MYCTU	Mattow et al., 2003
I6Y890_MYCTU	Mattow et al., 2003
I6Y8B5_MYCTU	Zhou et al., 2015
I6Y8R4_MYCTU	Vizcaino et al., 2010
I6Y8Y8_MYCTU	Zhou et al., 2015
I6YAY5_MYCTU	Zhou et al., 2015
I6YBQ3_MYCTU	Zhou et al., 2015
I6YBZ8_MYCTU	Mattow et al., 2003
I6YF08_MYCTU	Malen et al., 2007; Mattow et al., 2003; Zhou et al., 2015
I6YF16_MYCTU	Mattow et al., 2003
I6YF40_MYCTU	Mattow et al., 2003
I6YGJ4_MYCTU	Zhou et al., 2015
I6YGW9_MYCTU	Mattow et al., 2003
IDER_MYCTU	Mattow et al., 2003
IF1_MYCTU	Mattow et al., 2003
IPYR_MYCTU	Mattow et al., 2003
KAD_MYCTU	Mattow et al., 2003
KATG_MYCTU	Vizcaino et al., 2010
KHSE_MYCTU	Zhou et al., 2015; Vizcaino et al., 2010
L0T243_MYCTU	Vizcaino et al., 2010
L0TA08_MYCTU	Zhou et al., 2015
L0TBR2_MYCTU	Vizcaino et al., 2010
L7N648_MYCTU	Zhou et al., 2015
L7N657_MYCTU	Malen et al., 2007; Mattow et al., 2003
L7N664_MYCTU	Zhou et al., 2015
L7N695_MYCTU	Vizcaíno et al., 2010
L7N695_MYCTU	Zhou et al., 2015
L7N6B0_MYCTU	Zhou et al., 2015; Vizcaíno et al., 2010
L7N6B2_MYCTU	Zhou et al., 2015
LDT1_MYCTU	Vizcaíno et al., 2010
LDT4_MYCTU	Vizcaino et al., 2010
LPPB_MYCTU	Vizcaino et al., 2010
LPPC_MYCTU	Vizcaino et al., 2010
LPPJ_MYCTU	Vizcaino et al., 2010
LPQH_MYCTU	Zhou et al., 2015
LPQW_MYCTU	Zhou et al., 2015
LPRA_MYCTU	Vizcaino et al., 2010
LPRE_MYCTU	Vizcaino et al., 2010
LPRG_MYCTU	Zhou et al., 2015
LPRI_MYCTU	Vizcaino et al., 2010
LYS25_MYCTU	Saint-Joanis et al., 2006
MASZ_MYCTU	Vizcaino et al., 2010
MENB_MYCTU	Mattow et al., 2003
MHUD_MYCTU	He et al., 2003
MMPL1_MYCTU	Vizcaino et al., 2010
MMPLA_MYCTU	Vizcaino et al., 2010
MMPS2_MYCTU	Vizcaino et al., 2010
MMPS5_MYCTU	Vizcaino et al., 2010
MP63_MYCTU	Malen et al., 2007; Mattow et al., 2003
MP64_MYCTU	Malen et al., 2007; Mattow et al., 2003
MPRB_MYCTU	Vizcaino et al., 2010
MPT51_MYCTU	Malen et al., 2007; Mattow et al., 2003
MPT53_MYCTU	Nagai et al., 1991
MTB12_MYCTU	Vizcaino et al., 2010
MTCA1_MYCTU	Mattow et al., 2003
MTRA_MYCTU	Mattow et al., 2003
MUTT4_MYCTU	Zhou et al., 2015
NARG_MYCTU	Vizcaino et al., 2010
NDK_MYCTU	Malen et al., 2007; Mattow et al., 2003
NUOC_MYCTU	Mattow et al., 2003
NUSG_MYCTU	Mattow et al., 2003
O05573_MYCTU	Zhou et al., 2015
O05579_MYCTU	Vizcaino et al., 2010
O05582_MYCTU	Vizcaino et al., 2010
O06392_MYCTU	Vizcaino et al., 2010
O06556_MYCTU	Vizcaino et al., 2010
O06611_MYCTU	Zhou et al., 2015
O06612_MYCTU	Zhou et al., 2015
O06823_MYCTU	Vizcaino et al., 2010
O07175_MYCTU	Malen et al., 2007; Mattow et al., 2003
O07222_MYCTU	Vizcaino et al., 2010
O07236_MYCTU	Vizcaino et al., 2010
O07242_MYCTU	Roy et al., 2013
O07416_MYCTU	Vizcaino et al., 2010
O07417_MYCTU	Vizcaíno et al., 2010
O07427_MYCTU	Malen et al., 2007
O07726_MYCTU	Vizcaino et al., 2010
O07741_MYCTU	Vizcaino et al., 2010
O07745_MYCTU	Vizcaino et al., 2010
O33186_MYCTU	Mattow et al., 2003
O33270_MYCTU	Vizcaino et al., 2010
O50398_MYCTU	Malen et al., 2007; Sinha et al., 2005; Gu et al., 2003; Bahk et al., 2004
O50430_MYCTU	Vizcaino et al., 2010
O50442_MYCTU	Vizcaino et al., 2010
O53146_MYCTU	Vizcaino et al., 2010
O53154_MYCTU	Mattow et al., 2003
O53196_MYCTU	Vizcaino et al., 2010
O53310_MYCTU	Vizcaino et al., 2010
O53356_MYCTU	Mattow et al., 2003
O53361_MYCTU	Malen et al., 2007; Zhouet al., 2015
O53390_MYCTU	Zhou et al., 2015
O53398_MYCTU	Vizcaino et al., 2010
O53422_MYCTU	Malen et al., 2007; Mattow et al., 2003
O53423_MYCTU	Zhou et al., 2015
O53462_MYCTU	Zhou et al., 2015
O53527_MYCTU	Vizcaino et al., 2010
O53608_MYCTU	Vizcaino et al., 2010
O53611_MYCTU	Vizcaino et al., 2010
O53620_MYCTU	Vizcaino et al., 2010
O53666_MYCTU	Vizcaino et al., 2010
O53673_MYCTU	Zhou et al., 2015
O53695_MYCTU	Vizcaíno et al., 2010
O53731_MYCTU	Vizcaino et al., 2010
O53740_MYCTU	Malen et al., 2007; Mattow et al., 2003
O53780_MYCTU	Vizcaino et al., 2010
O53846_MYCTU	Malen et al., 2007
O53846_MYCTU	Zhou et al., 2015
O53850_MYCTU	Vizcaino et al., 2010
O53863_MYCTU	Vizcaino et al., 2010
O53896_MYCTU	Mattow et al., 2003
O53953_MYCTU	Zhou et al., 2015;Vizcaino et al., 2010
O69667_MYCTU	Mattow et al., 2003
O86326_MYCTU	Vizcaino et al., 2010
O86337_MYCTU	Zhou et al., 2015
O86339_MYCTU	Vizcaino et al., 2010
O86361_MYCTU	Mattow et al., 2003
ODP1_MYCTU	Vizcaino et al., 2010
P71799_MYCTU	Vizcaino et al., 2010
P71810_MYCTU	Vizcaino et al., 2010
P71840_MYCTU	Vizcaino et al., 2010
P71898_MYCTU	Vizcaino et al., 2010
P71958_MYCTU	Zhou et al., 2015
P71965_MYCTU	Vizcaino et al., 2010
P71969_MYCTU	Vizcaino et al., 2010
P71990_MYCTU	Mattow et al., 2003; Vizcaino et al., 2010
P95146_MYCTU	Vizcaino et al., 2010
P95164_MYCTU	Vizcaino et al., 2010
P95198_MYCTU	Mattow et al., 2003
P95206_MYCTU	Vizcaino et al., 2010
P96233_MYCTU	Sinha et al., 2005; Gu et al., 2003; Bahk et al., 2004
P96257_MYCTU	Vizcaino et al., 2010
P96378_MYCTU	Vizcaino et al., 2010
P96401_MYCTU	Vizcaino et al., 2010
P96817_MYCTU	Vizcaíno et al., 2010
P96874_MYCTU	Mattow et al., 2003
PAND_MYCTU	Zhou et al., 2015
PCKG_MYCTU	Vizcaino et al., 2010
PE15_MYCTU	Vizcaino et al., 2010
PE25_MYCTU	Vizcaino et al., 2010
PGK_MYCTU	Vizcaino et al., 2010
PHS_MYCTU	Mattow et al., 2003
PKNA_MYCTU	Vizcaino et al., 2010
PPE11_MYCTU	Vizcaino et al., 2010
PPE41_MYCTU	Vizcaino et al., 2010
PPIA_MYCTU	Malen et al., 2007; Mattow et al., 2003
PR28_MYCTU	Vizcaino et al., 2010
PSA_MYCTU	Mattow et al., 2003
PSB_MYCTU	Malen et al., 2007; Mattow et al., 2003
PSS_MYCTU	Vizcaino et al., 2010
PSTS1_MYCTU	Malen et al., 2007; Sinha et al., 2005; Gu et al., 2003; Mattow et al., 2003; Zhou et al., 2015
PSTS2_MYCTU	Malen et al., 2007; Mattow et al., 2003
PSTS3_MYCTU	Vizcaino et al., 2010
PTA_MYCTU	Vizcaino et al., 2010
Q10838_MYCTU	Zhou et al., 2015
Q79FB3_MYCTU	Zhou et al., 2015
Q79FN7_MYCTU	Mattow et al., 2003
Q79G13_MYCTU	Vizcaíno et al., 2010
Q8VJ48_MYCTO	Bahk et al., 2004
RECC_MYCTU	Vizcaino et al., 2010
RF2_MYCTU	Mattow et al., 2003
RIBBA_MYCTU	Vizcaino et al., 2010
RIPA_MYCTU	Vizcaino et al., 2010
RL7_MYCTU	Sinha et al., 2005; Gu et al., 2003; Bahk et al., 2004
RPFA_MYCTU	Vizcaino et al., 2010
RPFC_MYCTU	Vizcaino et al., 2010
RPFE_MYCTU	Vizcaino et al., 2010
RPIB_MYCTU	Malen et al., 2007; Mattow et al., 2003; Vizcaino et al., 2010
RPOA_MYCTU	Mattow et al., 2003
RRAAH_MYCTU	Mattow et al., 2003
RRF_MYCTU	Mattow et al., 2003
RS10_MYCTU	Mattow et al., 2003; Zhou et al., 2015
RS14Z_MYCTU	Mattow et al., 2003
RS6_MYCTU	Mattow et al., 2003
RTCB_MYCTU	Vizcaino et al., 2010
Rv0403	Vizcaino et al., 2010
RV203_MYCTU	Vizcaino et al., 2010
Rv3128c	Zhou et al., 2015
Rv3160	Gu et al., 2003; Bahk et al., 2004; Sinha et al., 2005
SECY_MYCTU	Vizcaino et al., 2010
SENX3_MYCTU	Vizcaino et al., 2010
SERC_MYCTU	Vizcaino et al., 2010
SIGE_MYCTU	Zhou et al., 2015
SODC_MYCTU	Zhou et al., 2015
SODF_MYCTU	Malen et al., 2007; Mattow et al., 2003
SSB_MYCTU	Malen et al., 2007; Mattow et al., 2003
TAL_MYCTU	Vizcaino et al., 2010
TGS1_MYCTU	Zhou et al., 2015
THIO_MYCTU	Malen et al., 2007; Mattow et al., 2003
THRC_MYCTU	Mattow et al., 2003
THTR_MYCTU	Mattow et al., 2003
TIG_MYCTU	Mattow et al., 2003
TKT_MYCTU	Vizcaino et al., 2010
TPIS_MYCTU	Malen et al., 2007; Mattow et al., 2003
TPX_MYCTU	Malen et al., 2007; Mattow et al., 2003
TRPD_MYCTU	Vizcaino et al., 2010
WA22_MYCTU	Vizcaino et al., 2010
WAG31_MYCTU	Mattow et al., 2003
Y0569_MYCTU	Mattow et al., 2003
Y0569_MYCTU	Zhou et al., 2015
Y064_MYCTU	Vizcaino et al., 2010
Y1077_MYCTU	Vizcaino et al., 2010
Y1269_MYCTU	Vizcaino et al., 2010
Y1351_MYCTU	Mattow et al., 2003; Vizcaino et al., 2010
Y1352_MYCTU	Malen et al., 2007; Mattow et al., 2003
Y1419_MYCTU	Vizcaino et al., 2010
Y1488_MYCTU	Vizcaino et al., 2010
Y1592_MYCTU	Zhou et al., 2015
Y1636_MYCTU	Sinha et al., 2005; Gu et al., 2003; Bahk et al., 2004
Y1738_MYCTU	Mattow et al., 2003
Y1770_MYCTU	Vizcaino et al., 2010
Y1812_MYCTU	Vizcaino et al., 2010
Y1815_MYCTU	Vizcaino et al., 2010
Y1815_MYCTU	Zhou et al., 2015; Vizcaino et al., 2010
Y1899_MYCTU	Vizcaino et al., 2010
Y1910_MYCTU	Vizcaino et al., 2010
Y1998_MYCTU	Zhou et al., 2015
Y2005_MYCTU	Zhou et al., 2015
Y2006_MYCTU	Vizcaino et al., 2010
Y2012_MYCTU	Zhou et al., 2015
Y2074_MYCTU	Vizcaino et al., 2010
Y2140_MYCTU	Malen et al., 2007; Mattow et al., 2003
Y2190_MYCTU	Vizcaino et al., 2010
Y2204_MYCTU	Mattow et al., 2003
Y2297_MYCTU	Mattow et al., 2003; Vizcaino et al., 2010
Y2302_MYCTU	Mattow et al., 2003
Y2563_MYCTU	Vizcaino et al., 2010
Y2575_MYCTU	Vizcaino et al., 2010
Y2576_MYCTU	Vizcaino et al., 2010
Y2585_MYCTU	Vizcaino et al., 2010
Y2603_MYCTU	Mattow et al., 2003
Y2623_MYCTU	Zhou et al., 2015
Y2629_MYCTU	Zhou et al., 2015
Y2716_MYCTU	Mattow et al., 2003
Y2895_MYCTU	Mattow et al., 2003
Y3400_MYCTU	Mattow et al., 2003
Y3630_MYCTU	Vizcaino et al., 2010
Y3716_MYCTU	Mattow et al., 2003
Y472_MYCTU	Vizcaino et al., 2010
Y477_MYCTU	Vizcaino et al., 2010
Y501_MYCTU	Vizcaino et al., 2010
Y559_MYCTU	Vizcaino et al., 2010
Y560_MYCTU	Sinha et al., 2005; Gu et al., 2003; Bahk et al., 2004
Y566_MYCTU	Mattow et al., 2003; Bahk et al., 2004
Y851_MYCTU	Sinha et al., 2005; Gu et al., 2003; Bahk et al., 2004
Y876_MYCTU	Vizcaino et al., 2010
