# Supplementary material for: Secretome Prediction of Two M. tuberculosis Clinical Isolates Reveals Their High Antigenic Density and Potential Drug Targets
Source: Front Microbiol. 2017 Feb 7;8:128. doi: 10.3389/fmicb.2017.00128 (PMC5293778; doi:10.3389/fmicb.2017.00128)
Supplement: Supplementary file 5 [file Table5.XLSX]

## Sheet: Table S6
S5 Table. Potential drug targets against proteins in the core Mtb secretome
M.tb secretome ID	M.tb protein name	DrugBank target protein	DrugBank target Organism	DrugBank E value	Drug name	DrugBank ID	Drug group	Pharmacological Action
prot_00846	short-chain dehydrogenase	3-alpha-(or 20-beta)-hydroxysteroid dehydrogenase	M. tuberculosis	9.2e-26	Aetiocholanolone	DB02854	experimental	unknown
prot_01273	3-hydroxyacyl-CoA dehydrogenase	3-alpha-(or 20-beta)-hydroxysteroid dehydrogenase	M. tuberculosis	7.45e-15	Aetiocholanolone	DB02854	experimental	unknown
prot_03166	3-oxoacyl-ACP reductase	3-alpha-(or 20-beta)-hydroxysteroid dehydrogenase	M. tuberculosis	3.11e-27	Aetiocholanolone	DB02854	experimental	unknown
prot_03878	3-oxoacyl-ACP reductase	3-alpha-(or 20-beta)-hydroxysteroid dehydrogenase	M. tuberculosis	2.7e-13	Aetiocholanolone	DB02854	experimental	unknown
prot_01044	secreted antigen 85-C FbpC_2	Diacylglycerol acyltransferase/mycolyltransferase Ag85C	M. tuberculosis	1.46e-05	Diethylphosphono group 2-hidroxymethyl-6-octylsulfanyl-tetrahydro-pyran-3,4,5-triol	DB02811	experimental /experimental	unknown/unknown
prot_02081	glutamine synthetase	Glutamine synthetase 1	M. tuberculosis	8.79e-18	Citric Acid	DB04272	nutraceutical, vet_approved	unknown
prot_02459	glutamine synthetase	Glutamine synthetase 1	M. tuberculosis	0	Citric Acid	DB04272	nutraceutical, vet_approved	unknown
prot_03439	NADPH-ferredoxin reductase FprA	NADPH-ferredoxin reductase FprA	M. tuberculosis	0	4-Oxo-Nicotinamide-Adenine Dinucleotide Phosphate	DB01753	experimental	unknown
prot_00895	thiosulfate sulfurtransferase cysA2	3-mercaptopyruvate sulfurtransferase	E. coli	3.81e-30	S-Mercaptocysteine	DB02761	experimental	unknown
prot_00995	conserved exported protein of uncharacterised function	Probable L-ascorbate-6-phosphate lactonase UlaG	E. coli	0.000508	N-Formylmethionine	DB04464	experimental	unknown
prot_00996	serine hydrolase	Class C beta-lactamase	E. cloacae	0.000868	(6,7-Dihydro-5h-Cyclopenta[D]Imidazo[2,1-B]Thiazol-2-Yl]-4,7-Dihydro[1,4]Thiazepine-3,6-Dicarboxylic Acid	DB03970	experimental	unknown
prot_01302	monoacyl phosphatidylinositol tetramannoside-binding protein	Periplasmic oligopeptide-binding protein	S. typhimurium	8.18e-06	Naphthalen-2-YL-3-alanine	DB07365	experimental	unknown
prot_02131	lipoprotein	Class C beta-lactamase	E. cloacae	3.13e-13	(6,7-Dihydro-5h-Cyclopenta[D]Imidazo[2,1-B]Thiazol-2-Yl]-4,7-Dihydro[1,4]Thiazepine-3,6-Dicarboxylic Acid	DB03970	experimental	unknown
prot_02298	class A beta-lactamase	Beta-lactamase CTX-M	E. coli	4.63e-53	Sucrose/Pinacol[[2-Amino-Alpha-(1-Carboxy-1-Methylethoxyimino)-4-Thiazoleacetyl]Amino]Methaneboronate/Avibactam	DB02772/DB04035/DB09060	experimental/experimental/approved	unknown/unknown/inhibitor
prot_02873	lipoprotein	Periplasmic oligopeptide-binding protein	S. typhimurium	0.000597175	Naphthalen-2-YL-3-alanine	DB07365	experimental	unknown
prot_03225	D-alanyl-D-alanine carboxypeptidase	D-alanyl-D-alanine carboxypeptidase DacA	E. coli	3.29e-18	Cefmetazole	DB00274	approved	inhibitor
					Cefoperazone	DB01329	approved	inhibitor
					Cefoxitin	DB01331	approved	inhibitor
					Boc-gamma-D-glu-L-LYS(CBZ)-D-boroala	DB04647	experimental	unknown
prot_03451	thiosulfate sulfurtransferase cysA2	3-mercaptopyruvate sulfurtransferase	E. coli	3.81e-30	S-Mercaptocysteine	DB02761	experimental	unknown
prot_03658	ATP-dependent helicase	ATP-dependent DNA helicase RecQ	E. coli	3.31e-05	Phosphothiophosphoric Acid-Adenylate Ester	DB02930	experimental	unknown
prot_00529	short-chain type oxidoreductase	Dehydrogenase reductase SDR family member 11/ 3-alpha-(or 20-beta)-hydroxysteroid dehydrogenase	Human/ M.tuberculosis	8.11E-29/ 8.44E-09	2'-Monophosphoadenosine 5'-Diphosphoribose/ Aetiocholanolone	DB03461 / DB02854	experimental /experimental	unknown/unknown
prot_00842	short-chain dehydrogenase	Retinol dehydrogenase 8 / 3-alpha-(or 20-beta)-hydroxysteroid dehydrogenase	Human/ M.tuberculosis	5.22E-11 / 8.11E-06	Vitamin A / Aetiocholanolone	DB00162 / DB02854	approved, nutraceutical, vet_approved/ experimental	unknown/unknown
prot_01042	short chain dehydrogenase	Dehydrogenase-reductase SDR family member 11 / 3-alpha-(or 20-beta)-hydroxysteroid dehydrogenase	Human/ M.tuberculosis	2.23E-23 / 8.12E-08	2'-Monophosphoadenosine 5'-Diphosphoribose / Aetiocholanolone	DB03461 / DB02854	experimental /experimental	unknown/unknown
prot_01845	cytochrome P450	Cytochrome P450 4A11 / Cytochrome P450 130	Human/ M.tuberculosis	1.50E-26 / 1.91E-05	Pegvisomant / 1-[(2S)-2-[(4-chlorobenzyl)oxy]-2-(2,4-dichlorophenyl)ethyl]-1H-imidazole	DB00082 / DB07705	approved/experimental	inhibitor/unknown
prot_02805	peroxiredoxin	Peroxiredoxin-2 / Probable thiol peroxidase	Human/ M.tuberculosis	5.50E09/ 7.37E-06	3-Sulfinoalanine, N-Carbamoyl-Alanine / S-Oxy Cysteine	DB02153, DB04048 / DB03382	experimental,experimental/experimental	unknown, unknown/unknown
prot_00262	R2-like ligand-binding oxidase	Ribonucleoside-diphosphate reductase subunit M2	Human	5.96651e-05	Cladribine	DB00242	approved, investigational	inhibitor
					Imexon	DB05003	investigational	unknown
					Gallium nitrate	DB05260	approved, investigational	yes
					motexafin gadolinium	DB05428	investigational	unknown
					GTI 2040	DB05801	investigational	unknown
prot_01082	PE_PGRS family protein	Peptidyl-glycine alpha-amidating monooxygenase	Human	2.25387e-05	Vitamin C	DB00126	approved, nutraceutical	unknown
prot_02509	hypothetical protein	Heat shock cognate 71 kDa protein	Human	4.94918e-08	(2R,3R,4S,5R)-2-[6-amino-8-[(3,4-dichlorophenyl)methylamino]purin-9-yl]-5-(hydroxymethyl)oxolane-3,4-diol	DB07045	experimental	unknown
